# Supplementary material for: Resolving rates of mutation in the brain using single-neuron genomics
Source: eLife journal article supplement (doi:10.7554/elife.12966), 2016-02-22

Figure 4—figure supplement 1

A

| Samples evaluated                                   | Mean sequencing depth | Sample type          | Reference                                            | MAPD mean (SD) | MDAD mean (SD) | Best sample MAPD | Best sample MDAD |
|-----------------------------------------------------|-----------------------|----------------------|------------------------------------------------------|----------------|----------------|------------------|------------------|
| Cortex bulk DNA; Heart bulk DNA (Evrony et al)      | 39x                   | Unamplified bulk DNA | Simulated reads                                      | 0.02 (0.01)    | 0.03 (0.01)    | 0.01             | 0.02             |
| Cortex bulk DNA; Heart bulk DNA (Evrony et al)      | 39x                   | Unamplified bulk DNA | Unamplified bulk DNA (excluding test sample)         | 0.01 (0.00)    | 0.02 (0.00)    | 0.01             | 0.02             |
| Caudate 100-neurons (Evrony et al)                  | 37x                   | MDA 100-cell         | Pooled 8 MDA single neurons                          | 0.16           | 0.14           | 0.16             | 0.14             |
| Each of 16 cortex single neurons (Evrony et al)     | 49x                   | MDA single-cell      | MDA 100-neuron                                       | 0.33 (0.04)    | 0.27 (0.04)    | 0.29             | 0.23             |
| Each of 16 cortex single neurons (Evrony et al)     | Subsampled 0.1x       | MDA single-cell      | MDA 100-neuron                                       | 0.35 (0.04)    | 0.28 (0.04)    | 0.31             | 0.24             |
| Each of 3 SW480 single cells (Zong et al)           | 34x                   | MALBAC single-cell   | Pooled 2 MALBAC single cells (Zong et al)            | 0.18 (0.06)    | 0.23 (0.10)    | 0.12             | 0.14             |
| Each of 3 SW480 single cells (Zong et al)           | Subsampled 0.1x       | MALBAC single-cell   | Pooled 2 MALBAC single cells (Zong et al)            | 0.22 (0.06)    | 0.24 (0.09)    | 0.15             | 0.16             |
| Each of 92 hippocampus single neurons (Upton et al) | 0.7x                  | MALBAC single-cell   | Pooled 35 MALBAC cortex single neurons (Upton et al) | 0.53 (0.16)    | 0.54 (0.17)    | 0.28             | 0.26             |
| Pooled 92 hippocampus single neurons (Upton et al)  | 60x                   | MALBAC single-cell   | Pooled 35 MALBAC cortex single neurons (Upton et al) | 0.12           | 0.12           | 0.12             | 0.12             |
| Pooled 92 hippocampus single neurons (Upton et al)  | Subsampled 0.5x       | MALBAC single-cell   | Pooled 35 MALBAC cortex single neurons (Upton et al) | 0.14           | 0.13           | 0.14             | 0.13             |
| Pooled 92 hippocampus single neurons (Upton et al)  | Subsampled 0.1x       | MALBAC single-cell   | Pooled 35 MALBAC cortex single neurons (Upton et al) | 0.17           | 0.15           | 0.17             | 0.15             |

B

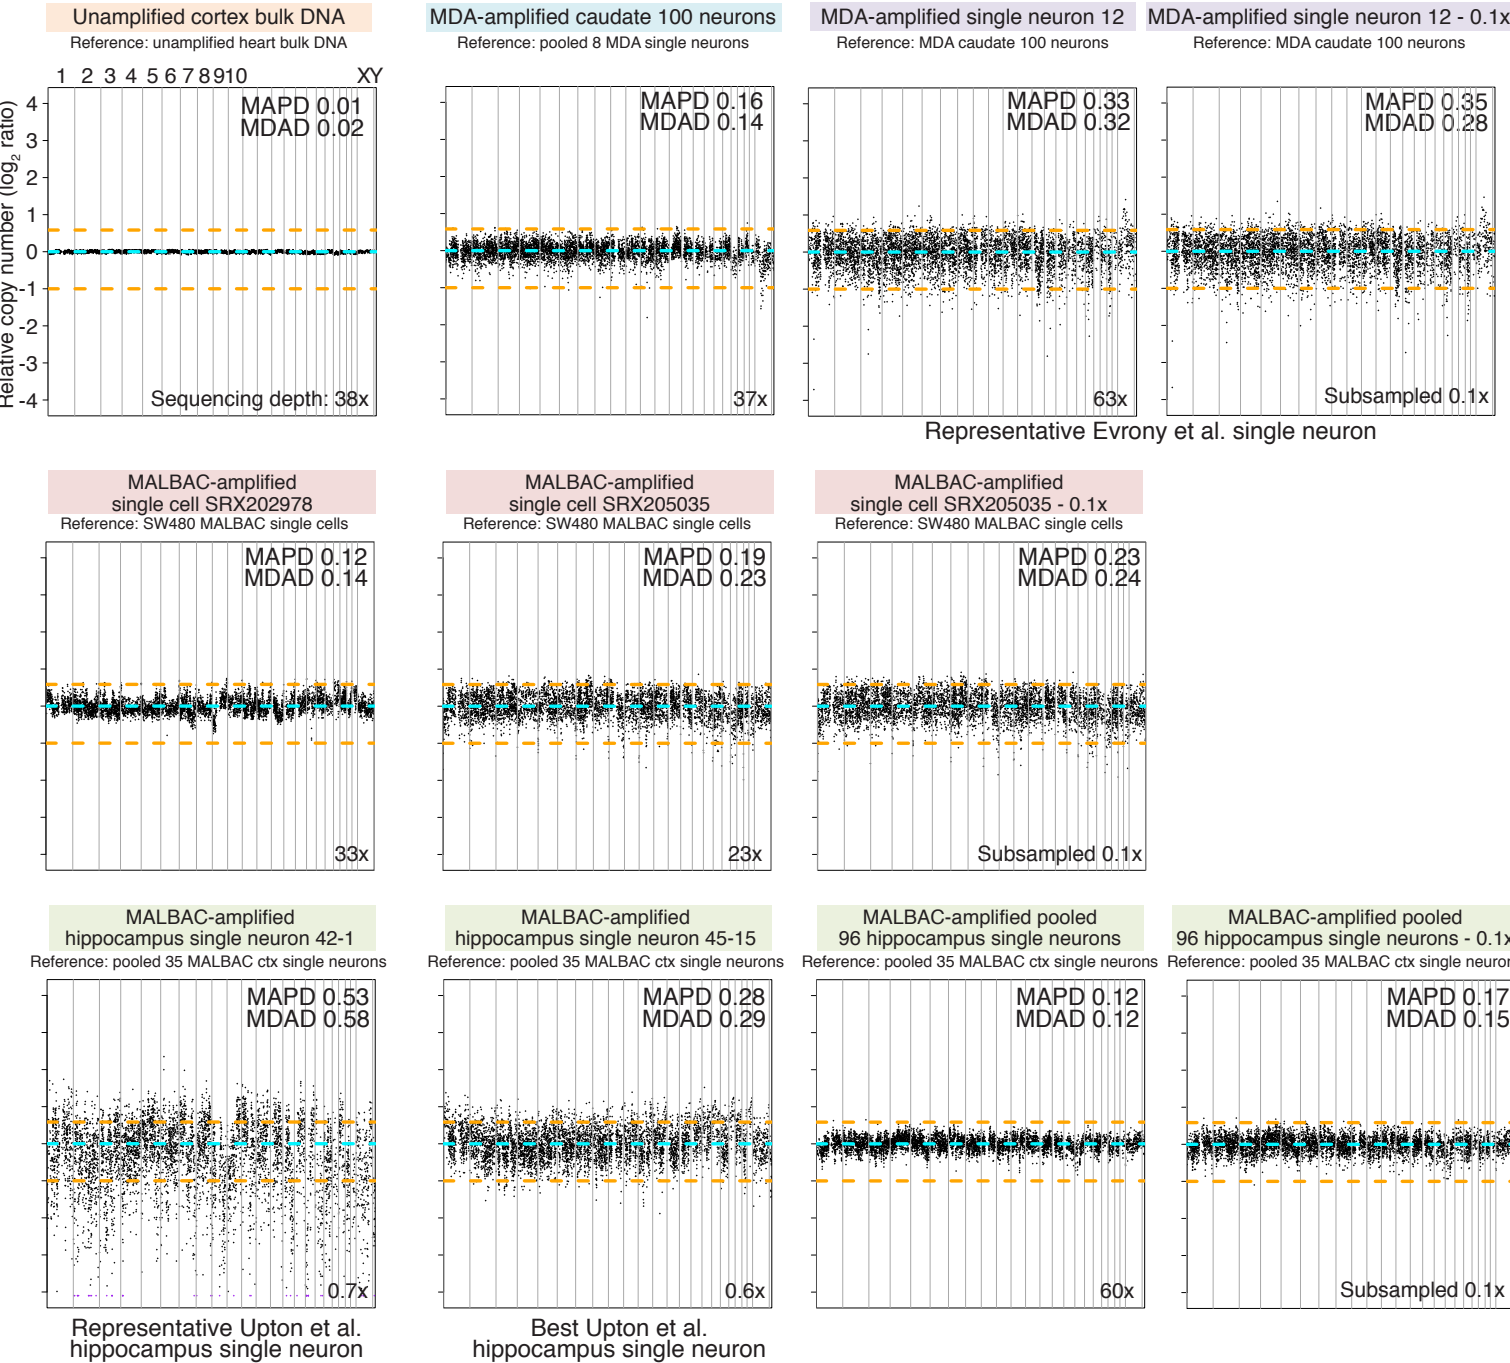

Supplement: supp [file elife-12966-supp-v1.zip]
