# Supplementary material for: Resolving rates of mutation in the brain using single-neuron genomics
Source: eLife journal article supplement (doi:10.7554/elife.12966), 2016-02-22

Figure 2—figure supplement 1

**A RC-seq: Germline chrX hemizygous KNR insertions**

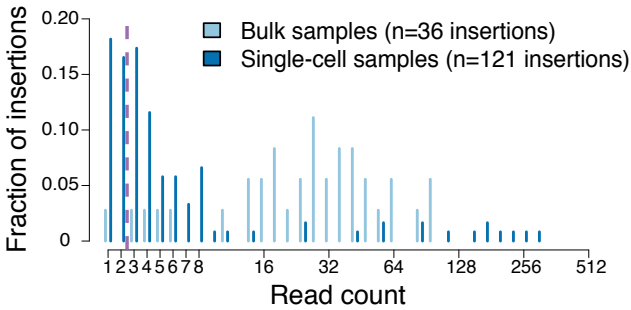

**B WGS: Germline gold-standard KNR insertions**

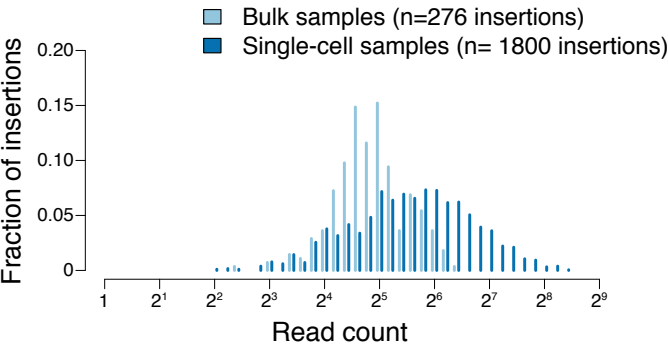

**C L1-IP: Germline gold-standard KNR insertions**

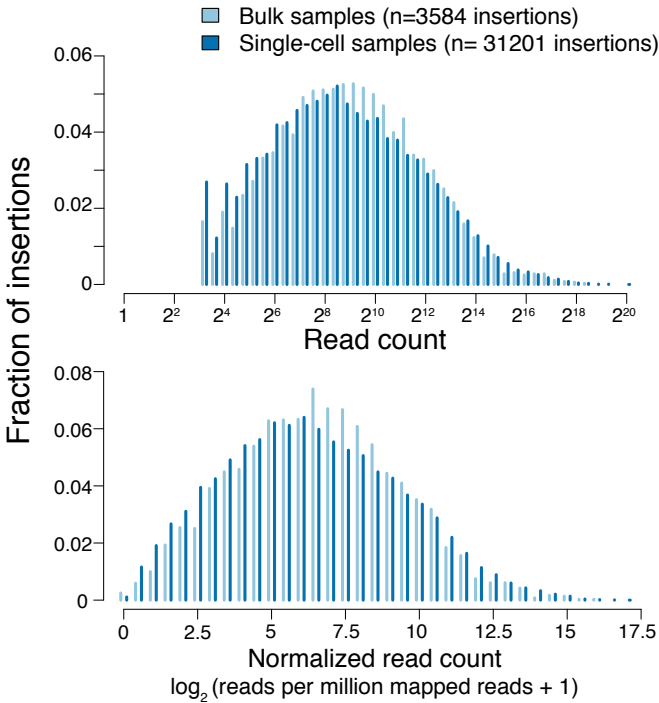

Supplement: supp [file elife-12966-supp-v1.zip]
