# Supplementary material for: Resolving rates of mutation in the brain using single-neuron genomics
Source: eLife journal article supplement (doi:10.7554/elife.12966), 2016-02-22
Supplement: supp [file elife-12966-supp-v1.zip]

Archive with 6 entries (6 files):
- elife_poa_e12966_Figure_4_figure_supplement_1.pdf
- elife_poa_e12966_Figure_2_figure_supplement_1.pdf
- elife_poa_e12966_Supplementary_File_1.xlsx
- elife_poa_e12966_Figure_1_figure_supplement_1.pdf
- elife_poa_e12966_Figure_3_figure_supplement_1.pdf
- elife_poa_e12966_Figure_4_figure_supplement_2.pdf
