# Supplementary figures and images for: Resolving rates of mutation in the brain using single-neuron genomics
Source: eLife journal article supplement (doi:10.7554/elife.12966), 2016-02-22

Figure 1—figure supplement 1

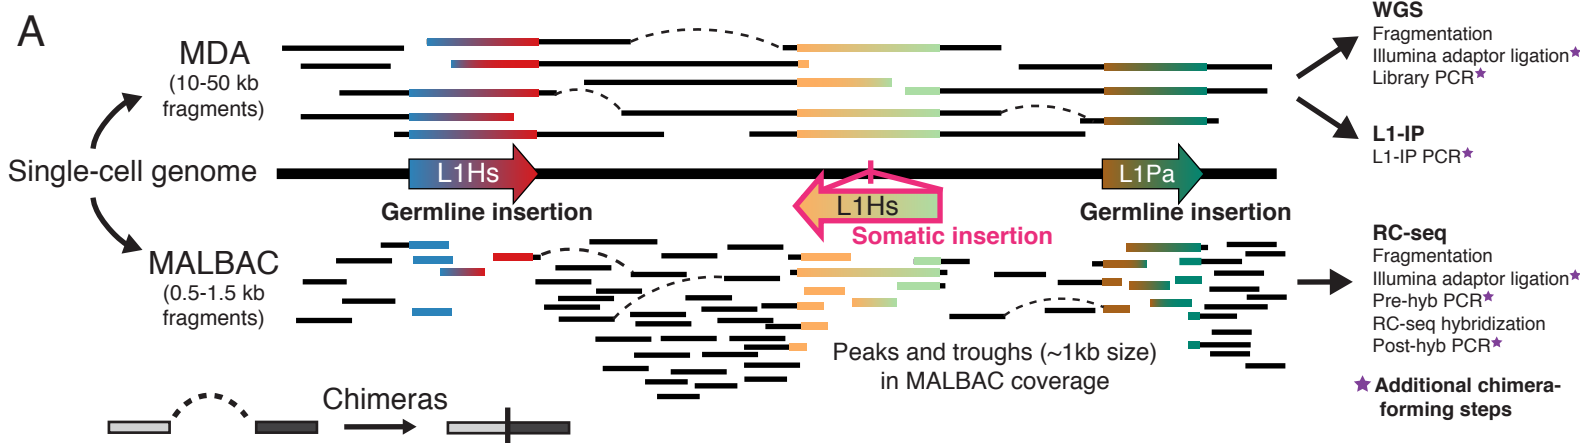

Read alignment to genome reference

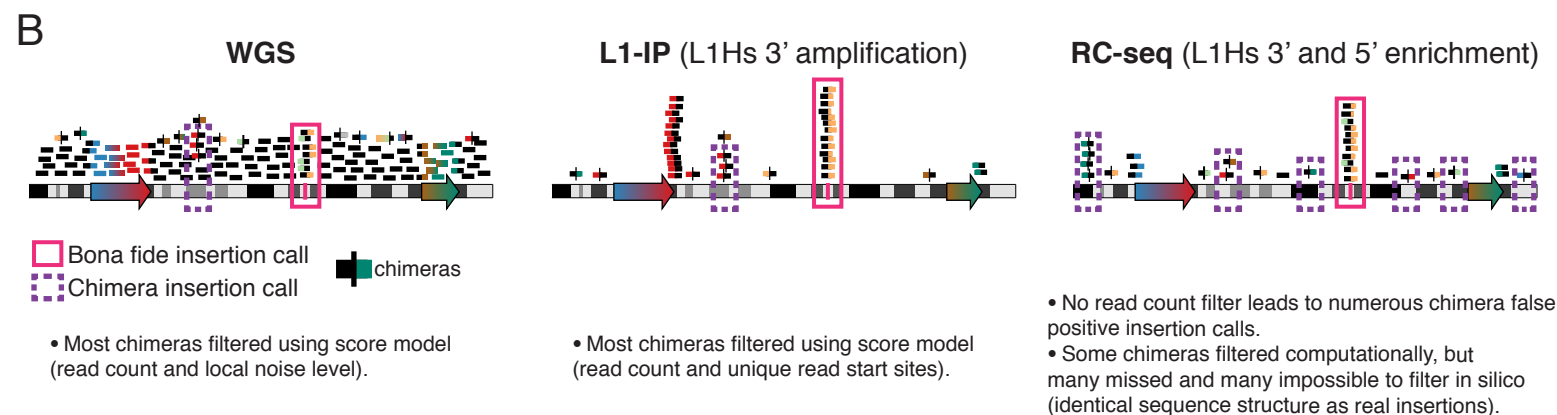

PCR validation

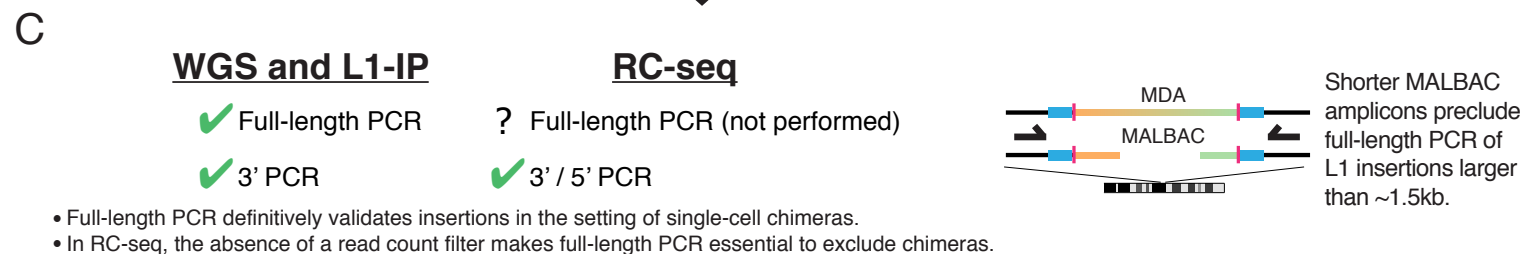

Supplement: supp [file elife-12966-supp-v1.zip]

Figure 3—figure supplement 1

Single-cell sensitivity for gold-standard KNR insertions

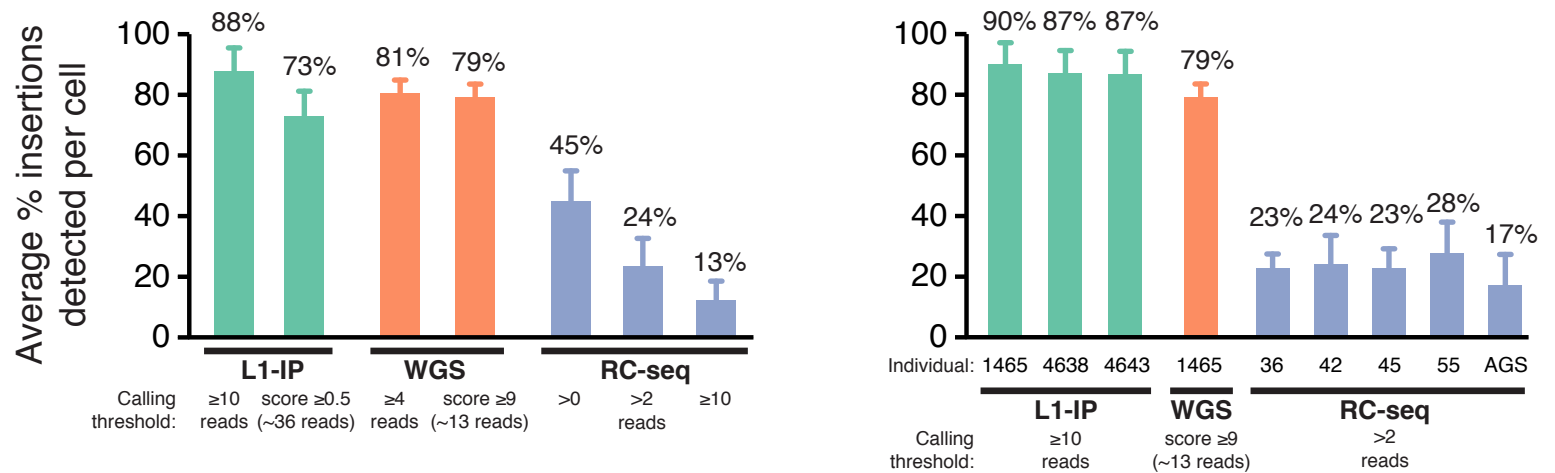

Supplement: supp [file elife-12966-supp-v1.zip]

Figure 4—figure supplement 2

A

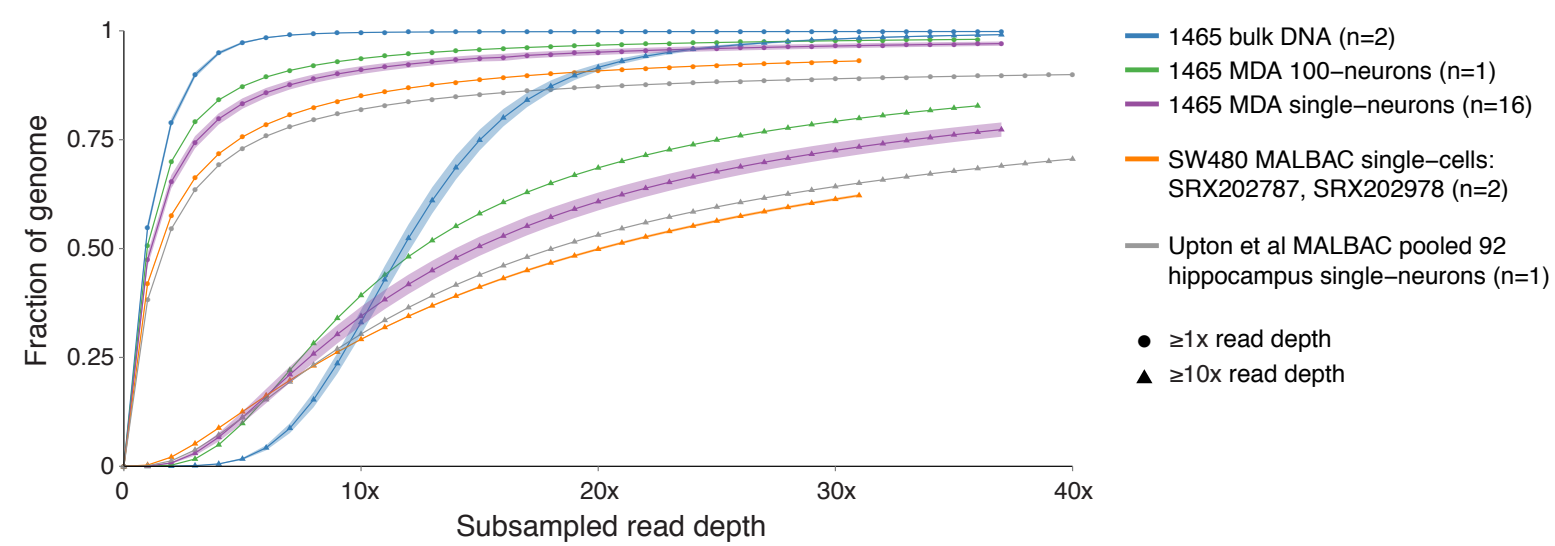

B

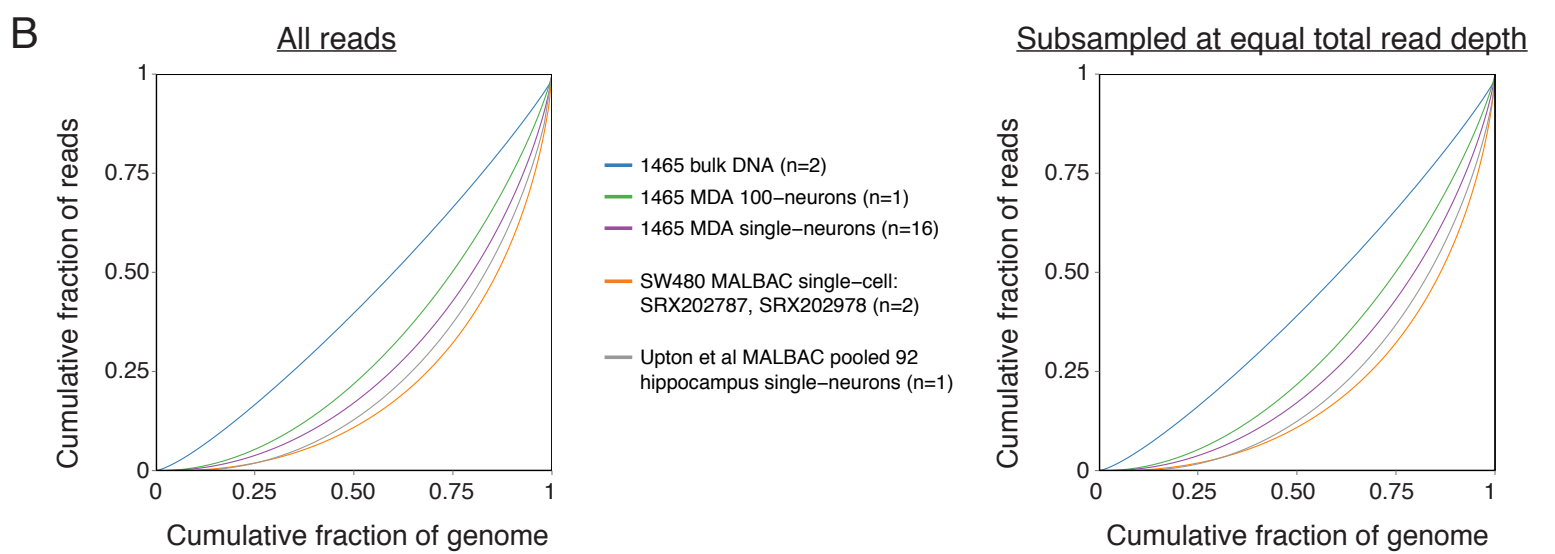

Supplement: supp [file elife-12966-supp-v1.zip › elife_poa_e12966_Figure_4_figure_supplement_2.pdf]
